# Supplementary material for: A Detailed Questionnaire for the Evaluation of Health Management in Dairy Sheep and Goats
Source: PubMed Central journal article supplement (PMC7552296; doi:10.3390/ani10091489), 2020-08-24
Supplement: animals-10-01489-s001.pdf [file animals-10-01489-s001.pdf]

Article

# A Detailed Questionnaire for Evaluation of Health Management in Dairy Sheep and Goats

Daphne T. Lianou, Ioanna P. Chatziprodromidou, Natalia G.C. Vasileiou, Charalambia K. Michael, Vasia S. Mavrogianni, Antonis P. Politis, Nick G. Kordalis, Charalambos Billinis, Alexios Giannakopoulos, Elias Papadopoulos, Ilias Giannenas, Katerina S. Ioannidi, Angeliki I. Katsafadou, Dimitris A. Gougoulis, Delia Lacasta, Mariangela Caroprese, George C. Fthenakis

**Supplementary material S1.** A detailed questionnaire for the evaluation of health management in sheep or goat dairy farms.

| No.                             | Question                                                                                                                                |
|---------------------------------|-----------------------------------------------------------------------------------------------------------------------------------------|
| <b>0. GENERAL</b>               |                                                                                                                                         |
| 001                             | Farm reference (no.)                                                                                                                    |
| 002                             | National identification of the farm (no.)                                                                                               |
| 003                             | Name of the farmer (name)                                                                                                               |
| 004                             | Address (description)                                                                                                                   |
| 005                             | Date of the visit (date)                                                                                                                |
| 006                             | Veterinarian(s) (name)                                                                                                                  |
| 007                             | Geographical coordinates (geographical latitude & longitude)                                                                            |
| 008                             | Production type (dairy / meat / wool / reproduction / other)                                                                            |
| 009                             | Management system (EFSA classification: shepherding / intensive / semi-intensive / semi-extensive / extensive / very extensive / mixed) |
| 010                             | Organic farm (yes / no)                                                                                                                 |
| 011                             | Start date of the most recent lambing / kidding season (date)                                                                           |
| <b>1. INFRASTRUCTURE</b>        |                                                                                                                                         |
| <b>1.1. General information</b> |                                                                                                                                         |
| 012                             | Year of the initial establishment of the farm (year)                                                                                    |
| 013                             | Year of establishment at the present location (year)                                                                                    |
| 014                             | Availability of a main building for animals (yes / no)                                                                                  |
| 015                             | Availability of a dedicated building for lambs / kids (yes / no)                                                                        |
| 016                             | Availability of a dedicated lambing / kidding area (yes / no)                                                                           |
| 017                             | Number of pens in the lambing / kidding area (no.)                                                                                      |
| 018                             | Accessory building(s) for animals (yes / no)                                                                                            |
| 019                             | Availability of sheds (yes / no)                                                                                                        |
| 020                             | Number of available sheds (no.)                                                                                                         |
| 021                             | Availability of sheds for storage of concentrate feedstuffs (yes / no)                                                                  |
| 022                             | Availability of sheds for storage of roughage (yes / no)                                                                                |
| 023                             | Availability of sheds for storage of silage (yes / no)                                                                                  |
| 024                             | Availability of a milking parlour (yes / no)                                                                                            |
| 025                             | Availability of a waiting area before the milking parlour (yes / no)                                                                    |
| 026                             | Availability of personnel areas (yes / no)                                                                                              |
| 027                             | Availability of area for veterinary works (yes / no)                                                                                    |
| 028                             | Availability of an office (yes / no)                                                                                                    |
| 029                             | Availability of a lavatory (yes / no)                                                                                                   |
| 030                             | Drainage type (local drainage network / cesspit)                                                                                        |
| 031                             | Availability of footbath (yes / no)                                                                                                     |
| 032                             | Availability of isolation facilities for animals (yes / no)                                                                             |
| 033                             | Availability of access road to the farm (yes / no)                                                                                      |
| 034                             | Electricity source (electricity network / generator / solar cells / other)                                                              |

- 035 Proximity to industrial sites (yes / no)  
 036 Proximity to industrial sites (distance)  
 037 Type of industrial sites near the farm (description)  
 038 Availability of waste processing facility (yes / no)  
 039 Availability of a ditch at the main entrance (yes / no)

---

## 1.2. Buildings

---

### 1.2.1. Main building

---

- 040 Material of the walls (bricks / plastered bricks / cement / wood / stone / plastic / straw / panel / tin / cinder blocks / other)  
 041 Material of the roof (bricks / plastered bricks / cement / wood / stone / plastic / straw / panel / tin / cinder blocks / tiles / other)  
 042 Dimensions of the building (length × width × height in m)  
 043 Openings in the walls (yes / no)  
 044 Number of openings in the walls (no.)  
 045 Opening in the roof (yes / no)  
 046 Orientation of the building (degrees)  
 047 Material of the floor (cement / soil / slatted wood / slatted metal / other)  
 048 Availability of straw bedding (yes / no)  
 049 Annual frequency of removal / clean-up of the straw bedding (no. of occasions)  
 059 Availability of ventilators (yes / no)  
 051 Number of available ventilators (no.)  
 052 Availability of artificial lighting (yes / no)

---

### 1.2.2. Building for lambs / kids

---

- 053 Dimensions of the building (length × width × height in m)  
 054 Availability of milk replacer facilities (yes / no)  
 055 Availability of equipment for administration of milk replacer to lambs (yes / no)  
 056 Availability of milk heating facilities (yes / no)  
 057 Number of plastic teats available (no.)  
 058 Openings in the walls (yes / no)  
 059 Openings in the walls (no.)  
 060 Opening in the roof (yes / no)  
 061 Administration of milk replacer to lambs (yes / no)  
 062 Daily frequency of administration of milk replacer to lambs (no. of occasions)  
 063 Grouping of lambs for administration of the milk replacer (yes / no)  
 064 Criteria for grouping of lambs for administration of the milk replacer (description)

---

### 1.2.3. Milking parlour

---

- 065 Year of initial establishment (year)  
 066 Year of most recent renovation (year)  
 067 Dimensions of the parlour (length × width × height in m)  
 068 Material of the floor (cement / tile / soil / other)  
 069 Type of milking system (mobile / non-mobile)  
 070 Type of milking parlour (fishbone / circular / linear parallel / linear one-sided / other)  
 071 Number of animal positions in the parlour (no.)  
 072 Number of available milking units (no.)  
 073 Provision of feed during milking (yes / no)  
 074 Availability of facilities for milk yield measurement (yes / no)  
 075 Type of facilities for milk yield measurement (individual / group)  
 076 Availability of milk quality indicators (yes / no)  
 077 Availability of milk flow indicators (yes / no)  
 078 System pulsation rate (no. s<sup>-1</sup>)  
 079 System pressure (no.)  
 080 Type of flow line (low / high)  
 081 Weekly frequency of check-ups of the system by farmer (no. of occasions)  
 082 Annual frequency of check-ups of the system by technicians (no. of occasions)  
 083 Type of system check-ups performed by technicians (dynamic / static)  
 084 Water cleaning of parlour after the milking sessions (yes / no)  
 085 Temperature of cleaning water (°C)  
 086 Use of detergent for parlour cleaning after the milking sessions (yes / no)

- 087 Criteria for changing teatcups (description)  
 088 Annual frequency of changing teatcups (no. of occasions)  
 089 Availability of a milk tank (yes / no)  
 090 Availability of a mixer in the milk tank (yes / no)  
 091 Temperature in the milk tank (°C)  
 092 Frequency of milk collection (description of the no. of times that the dairy company collects the milk)  
 093 Frequency of cleaning of milk tank (description of the occasions that the milk tank is routinely cleaned)  
 094 Date of the preceding collection of milk (description)

---

### 1.3. Equipment

---

- 095 Availability of a crate (yes / no)  
 096 Availability of scales (yes / no)  
 097 Scale type available (large / portable)  
 098 Availability of a roller crusher (yes / no)  
 099 Availability of a feed mill (yes / no)  
 100 Availability of an automated feeding system (yes / no)  
 101 Availability of a silage distributor (yes / no)  
 102 Availability of a straw cutter (yes / no)  
 103 Availability of automatic water filling system in troughs (yes / no)  
 104 Availability of system for waste removal (yes / no)  
 105 Availability of bathing tank (yes / no)  
 106 Availability of a generator (yes / no)  
 107 Availability of a tractor (yes / no)  
 108 Availability of a truck (yes / no)  
 109 Availability of a pick-up (yes / no)  
 110 Animal identification system used (ear-tags / boli / necklace)  
 111 Availability of automatic animal identification system (yes / no)  
 112 Availability of animal location identifiers (yes / no)  
 113 Total number of feed troughs available (no.)  
 114 Type of feed troughs available (metal / wood / plastic)  
 115 Total number of drinking troughs available (no.)  
 116 Type of drinking troughs available (metal / wood / plastic)  
 117 Availability of refrigerators (yes / no)  
 118 Description of available refrigerators (domestic use-type refrigerators / professional use-type refrigerators / deep freezers)  
 119 Availability of sensors for registration of environmental conditions (yes / no)  
 120 Description of available sensors for registration of environmental conditions (description)  
 121 Practicing sharing of equipment with other farms (yes / no)

---

### 1.4. Land

---

- 122 Grazing practiced (yes / no)  
 123 Total grazing land by the farm animals (acres)  
 124 Ownership of the grazing land (farmer / other private / public)  
 125 Private grazing land (acres)  
 126 Irrigation of the grazing land (yes / no)  
 127 Grazing of cultivated land (yes / no)  
 128 Total surface of the cultivated land (acres)  
 129 Plant types available in the grazing land (description)  
 130 Use of hydroponic facilities (yes / no)

---

## 2. ANIMALS

---

### 2.1. Small ruminants

---

- 131 Main animal species (sheep / goats)  
 132 Mixed farm (yes / no)  
 133 No. of ewes (no.)  
 134 No. of rams (no.)  
 135 No. of does (no.)  
 136 No. of bucks (no.)  
 137 Main breed of ewes / does (description)

- 138 Secondary breed of ewes / does (description)
- 139 Main breed of rams / bucks (description)
- 140 Secondary breed of rams / bucks (description)
- 141 Average age of culling ewes / does (years)
- 142 Average age of culling rams / bucks (years)
- 143 Average annual replacement rate of ewes / does (%)
- 144 Average annual replacement rate of rams / bucks (%)
- 145 Source of replacement animals (own animals / purchase)
- 146 Criteria for selection of own animals as replacements (description)
- 147 Criteria for selection of animals for purchase as replacements (description)
- 148 Purveyors of replacements to be purchased (description)

---

## 2.2. Other domestic animals in the farm

---

- 149 Adult cattle (yes / no)
- 150 Adult cattle (no.)
- 151 Calves (yes / no)
- 152 Calves (no.)
- 153 Buffaloes (yes / no)
- 154 Buffaloes (no.)
- 155 Pigs (yes / no)
- 156 Pigs (no.)
- 157 Rabbits (yes / no)
- 158 Rabbits (no.)
- 159 Poultry (yes / no)
- 160 Poultry (no.)
- 161 Domestic birds (yes / no)
- 162 Domestic birds (no.)
- 163 Dogs (yes / no)
- 164 Dogs (no.)
- 165 Sheepdogs (yes / no)
- 166 Sheepdogs (no.)
- 167 Cats (yes / no)
- 168 Cats (no.)
- 169 Exotic animals (yes / no)
- 170 Exotic animals (no.)
- 171 Horses (yes / no)
- 172 Horses (no.)
- 173 Donkeys or mules (yes / no)
- 174 Donkeys or mules (no.)
- 175 Other animals (yes / no)
- 176 Other animals (no.)

---

### 2.2.1. Rodents in the farm

---

- 177 Visual contacts of the farmer with rodents (yes / no)
- 178 Recognition of dead rodents in the farm grounds or within a radius of 500 m of the farm (yes / no)
- 179 Bioindications of rodents in the farm grounds or within a radius of 500 m of the farm (yes / no)
- 180 Description of bioindications of rodents (feed / faeces / other)
- 181 Recognition of rodents in feed troughs (yes / no)
- 182 Recognition of rodents in water troughs (yes / no)
- 183 Presence of rodents in fields within a radius of 2 km of the farm (yes / no)
- 184 Rodents identified within a radius of 2 km of the farm (description)
- 185 Administration of rodenticides (yes / no)
- 186 Annual frequency of administration of rodenticides (no. of occasions)

---

## 2.3. Wildlife

---

### 2.3.1. Wildlife mammals

---

- 187 Visual contacts of the farmer with wildlife mammals (yes / no)
- 188 Recognition of dead wildlife mammals in the farms grounds or within a radius of 500 m of the farm (yes / no)
- 189 Recognition of traces of wildlife mammals within a radius of 2 km of the farm (yes / no)
- 190 Recognition of wildlife mammals within a radius of 2 km of the farm (yes / no)

- 191 Recognition of damage to cultivations within a radius of 2 km of the farm (yes / no)  
 192 Population of wildlife mammals recognised within a radius of 2 km of the farm (no. of animals)  
 193 Wildlife mammals identified within a radius of 2 km of the farm (description)  
 194 Common grazing of sheep / goats with wildlife mammals (yes / no)  
 195 Species of wildlife mammals identified in common grazing (description)

---

### 2.3.2. Avian wildlife

- 196 Visual contacts of the farmer with avian wildlife (yes / no)  
 197 Recognition of dead avian wildlife in the farms grounds or within a radius of 500 m of the farm (yes / no)  
 198 Bioindications of avian wildlife in the farms grounds or within a radius of 500 m of the farm (yes / no)  
 199 Description of bioindications of avian wildlife (bird calls / feathers / feed / eggs)  
 200 Recognition of avian wildlife in feed troughs (yes / no)  
 201 Recognition of avian wildlife in water troughs (yes / no)  
 202 Presence of nests within the farm buildings (yes / no)  
 203 Presence of eggs in such nests (yes / no)  
 204 Presence of chicks in such nests (yes / no)  
 205 Population of avian wildlife recognised within a radius of 2 km of the farm (no. of animals)  
 206 Avian wildlife identified (description)

---

### 2.3.3. Hunting

- 207 Presence of hunters in the area around the farm within a radius of 2 km of the farm (yes / no)  
 208 Number of hunters in the area within a radius of 2 km of the farm (no.)  
 209 Weekly frequency of the presence of hunters in the area (no. of daily occasions)  
 210 Description of hunted avian species (description)  
 211 Description of hunted mammalian species (description)  
 212 Distance from the farm that hunting activity occurs (km)  
 213 Months during which hunting activity occurs (description)  
 214 Hunting activity of the farmer (yes / no)  
 215 Length of hunting activity of the farmer (no. of years)

---

## 3. PRODUCTION CHARACTERISTICS

- 216 Month of the start of the lambing / kidding season (description)  
 217 Usual month of the start of the milking period (description)  
 218 Usual month of the end of the milking period (month)  
 219 Total milk quantity obtained during the preceding milking period (litres)  
 220 Average fat content in milk during the preceding milking period (%)  
 221 Average protein content in milk during the preceding milking period (%)  
 222 Average somatic cell counts in milk during the preceding milking period (no.)  
 223 Total number of lambs / kids born during the preceding lambing season (no.)  
 224 Total number of lambs / kids sold during the preceding season (no.)  
 225 Average age of lambs / kids at slaughter (days)  
 226 Average live bodyweight of lambs / kids at slaughter (kg)  
 227 Average carcass weight of these at slaughter (kg)  
 228 Total number of ewe- or ram-lambs / doelings or bucklings sold during the preceding period (no.)  
 229 Average carcass weight of these at slaughter (kg)  
 230 Record keeping (yes / no)  
 231 Type of records kept (paper / electronic)  
 232 Local manufacturing of dairy products (yes / no)  
 233 Objective of local manufacturing of dairy products (sale / home consumption)  
 234 Types of dairy products in local production (description)

---

## 4. HEALTH MANAGEMENT

### 4.1. Health parametres

- 235 The two health problems in lambs / kids considered to be of the higher importance (description)  
 236 Total cases of these two health problems in lambs / kids during the preceding season (no.)  
 237 The two health problems in replacement animals considered to be of the higher importance (description)  
 238 Total cases of these two health problems in replacement animals during the preceding season (no.)  
 239 The two health problems in adult animals considered to be of the higher importance (description)  
 240 Total cases of these two health problems in adult animals during the preceding season (no.)

|     |                                                                                                                |
|-----|----------------------------------------------------------------------------------------------------------------|
| 241 | Total deaths, of any cause, in adult animals during the preceding season (no.)                                 |
| 242 | Collaboration with a veterinarian (yes / no)                                                                   |
| 243 | Means of calculating live bodyweight for the administration of pharmaceutical products (weighing / estimation) |
| 244 | Routine overdosing (compared to dose prescribed) of pharmaceuticals (yes / no)                                 |
| 245 | Use of laboratory diagnostic examinations (yes / no)                                                           |
| 246 | In samples of milk (yes / no)                                                                                  |
| 247 | In samples of blood (yes / no)                                                                                 |
| 248 | In samples of faeces (yes / no)                                                                                |
| 249 | Laboratory diagnostic examinations performed in these samples (description)                                    |
| 250 | Total visits made annually by veterinarians to the farm during the preceding season (no.)                      |
| 251 | Reasons for the visits of the veterinarians (description)                                                      |
| 252 | Maintenance of prescribed withdrawal periods after administration of pharmaceuticals (yes / no)                |
| 253 | Evaluation of ammonia concentration within the buildings (yes / no)                                            |
| 254 | Animal deaths from attacks by wildlife animals (yes / no)                                                      |
| 255 | Total number of animal deaths by wildlife animals during the preceding season (no.)                            |
| 256 | Species of wildlife animals that caused animal deaths during the preceding season (description)                |
| 257 | Animal deaths from natural disasters (yes / no)                                                                |
| 258 | Total number of animal deaths from natural disasters during the preceding season (yes / no)                    |
| 259 | Description of natural disasters that caused animal deaths (description)                                       |

---

#### 4.2. Health problems

---

##### 4.2.1.a. Diseases of adult animals – mastitis

---

|     |                                                                            |
|-----|----------------------------------------------------------------------------|
| 260 | Total cases during the preceding season (no.)                              |
| 261 | Sample collection and testing for diagnostic purposes (yes / no)           |
| 262 | Treatment (yes / no)                                                       |
| 263 | Pharmaceuticals used for treatment (description)                           |
| 264 | Route for administration of antimicrobials (systematically / intramammary) |

##### 4.2.1.b. Diseases of adult animals – abortion

---

|     |                                                                  |
|-----|------------------------------------------------------------------|
| 265 | Total cases during the preceding season (no.)                    |
| 266 | Sample collection and testing for diagnostic purposes (yes / no) |
| 267 | Types of samples collected for testing (description)             |
| 268 | Pharmaceuticals used for treatment (description)                 |
| 269 | Collection of aborted material for safe disposal (yes / no)      |

##### 4.2.1.c. Diseases of adult animals – pregnancy toxemia

---

|     |                                               |
|-----|-----------------------------------------------|
| 270 | Total cases during the preceding season (no.) |
| 271 | Treatment performed (description)             |

##### 4.2.1.d. Diseases of adult animals – lameness

---

|     |                                               |
|-----|-----------------------------------------------|
| 272 | Total cases during the preceding season (no.) |
| 273 | Treatment performed (description)             |

##### 4.2.1.e. Diseases of adult animals – mange

---

|     |                                               |
|-----|-----------------------------------------------|
| 274 | Total cases during the preceding season (no.) |
| 275 | Treatment performed (description)             |

##### 4.2.1.f. Diseases of adult animals – obstetrical cases

---

|     |                                                                                          |
|-----|------------------------------------------------------------------------------------------|
| 276 | Total cases during the preceding season (no.)                                            |
| 277 | Call for veterinary support (yes / no)                                                   |
| 278 | Person who performed manipulations (veterinarian / farmer / non-veterinary staff member) |

##### 4.2.2.a. Diseases of young animals – respiratory problems

---

|     |                                                  |
|-----|--------------------------------------------------|
| 279 | Total cases during the preceding season (no.)    |
| 280 | Treatment performed (description)                |
| 281 | Pharmaceuticals used for treatment (description) |

##### 4.2.2.b. Diseases of young animals – diarrhoea

---

|     |                                                  |
|-----|--------------------------------------------------|
| 282 | Total cases during the preceding season (no.)    |
| 283 | Treatment performed (description)                |
| 284 | Pharmaceuticals used for treatment (description) |

#### 4.3. Management practices

---

|     |                                                                                                              |
|-----|--------------------------------------------------------------------------------------------------------------|
| 285 | Reproductive management (no hormonal control / administration of melatonin / administration of progestagens) |
| 286 | Duration of mating period (unlimited period / defined time-schedule)                                         |

- 287 Changes of rams / bucks into the ewes / does during the mating period (yes / no)
- 288 Castration of lambs / kids kept for fattening (yes / no)
- 289 Use of vasectomies (yes / no)
- 290 Use of artificial insemination (yes / no)
- 291 Use of embryo transfer (yes / no)
- 292 Use of ultrasound for pregnancy diagnosis (yes / no)
- 293 Nutritional modifications before the mating period (yes / no)
- 294 Nutritional modifications before the lambing period (yes / no)
- 295 Beginning of the mating period for ewes / does (month)
- 296 End of the mating period for ewes / does (month)
- 297 Beginning of the mating period for ewe-lambs and doelings (month)
- 298 End of the mating period for ewe-lambs and doelings (month)
- 299 Grouping of pregnant females during the final stage of pregnancy (yes / no)
- 300 Induction of lambing (yes / no)
- 301 Newborn care and specific monitoring (yes / no)
- 302 Maintenance of a colostrum bank (yes / no)
- 303 Lamb / kid fostering to female animals other than their dams (yes / no)
- 304 Reasons for doing this practice (description)
- 305 Administration of a lamb- / kid-specific diet (yes / no)
- 306 Age for lamb / kid removal from their dams (days)
- 307 Age of weaning of lambs / kids (days)
- 308 Daily number of milking sessions (no.)
- 309 Method for drying-off at the end of the lactation period (abrupt / progressive)
- 310 Duration of the dry-period (months)
- 311 Seasonal transfer of animals to other site (yes / no)
- 312 Means of animal transfer between sites (description)
- 313 Distance between sites (km)
- 314 Nights out during transfer between sites (yes / no)
- 315 Post-mortem examination of animals that die (yes / no)
- 316 Disposal of carcasses from dead animals (incineration / burying / feeding to dogs / feeding to birds / drop-off away)
- 317 Reporting to the farming insurance agency (yes / no)
- 318 Compensation by the farming insurance agency (yes / no)
- 319 Manure management (spread to fields / sale / disposal / feed to animals / biogas production)
- 320 Security presence at the farm (yes / no)
- 321 Duration of security attendance (continuous / morning & night visits / once daily visit / other)
- 322 Farm security (light wire fence / strong wire fence / stoned wall / wooden wall / alarm / other / no security)
- 323 Recording of vehicles entering into the farm (yes / no)
- 324 Availability of disinfectant at entrance ditch (yes / no)

---

#### 4.4. Vaccinations

---

- 325 Against *Chlamydia* infection (yes / no)
- 326 Description of schedule:
- 327 Against *Toxoplasma* infection (yes / no)
- 328 Description of schedule:
- 329 Against *Brucella* infection (yes / no)
- 330 Description of schedule:
- 331 Against clostridial infection (yes / no)
- 332 Description of schedule:
- 333 Against mastitis (yes / no)
- 334 Description of schedule:
- 335 Against contagious agalactia (yes / no)
- 336 Description of schedule:
- 337 Against bacterial respiratory infections (yes / no)
- 338 Description of schedule:
- 339 Against orf (yes / no)
- 340 Description of schedule:
- 341 Against paratuberculosis (yes / no)

- 342 Description of schedule:  
 343 Against foot-rot (yes / no)  
 344 Description of schedule:

---

#### 4.5. Administrations of antiparasitics

---

##### 4.5.1.a. Antiparasitic administrations – Anthelmintic treatments to small ruminants

---

- 345 Administration of anthelmintics to sheep / goats in the farm (yes / no)  
 346 Administration of anthelmintics to all or only some animals in the farm at the same time (all / some)  
 347 Timing of administration within the annual production cycle (before the mating season / at the beginning of dry-period / at the final stage of pregnancy / 1st-2nd month of the lactation period / 3rd-6th month of the lactation period)  
 348 Anthelmintics administered (description)  
 349 Pharmaceutical form administered (description)  
 350 Use of environmental applications for helminth control (yes / no)  
 351 Which ones (description)

---

##### 4.5.2. Antiparasitic administrations – Ectoparasiticide treatments to small ruminants

---

- 352 Administration of ectoparasiticides to sheep / goats in the farm (yes / no)  
 353 Timing of administration within the annual production cycle (before the mating season / at the beginning of dry-period / at the final stage of pregnancy / 1st-2nd month of the lactation period / 3rd-6th month of the lactation period)  
 354 Ectoparasiticides administered (description)  
 355 Pharmaceutical form administered (description)  
 356 Use of environmental applications for ectoparasite control (yes / no)  
 357 Which ones (description)

---

##### 4.5.3. Antiparasitic administrations – Antiparasitic treatments to dogs in the farm

---

- 358 Administration of antiparasitics to dogs in the farm (yes / no)  
 359 Antiparasitics used (description)  
 360 Pharmaceutical form administered (description)

---

#### 4.6. Other health management practices

---

- 361 Application of disinfections in the farm (yes / no)  
 362 Annual frequency of systemic disinfections in the farm (no. of occasions)  
 363 Administration of oxytetracycline to the pregnant animals (yes / no)  
 364 Administration of selenium to pregnant animals (yes / no)  
 365 Administration of selenium to newborn animals (yes / no)  
 366 Administration of 'dry-ewe' treatment at the end of the lactation period (yes / no)  
 367 Use of teat disinfection before milking (yes / no)  
 368 Use of teat disinfection after milking (yes / no)  
 369 Use of teat spraying after milking (yes / no)  
 370 Weekly frequency of changing teat disinfectant in the cup (no. of occasions)  
 371 Foot care (yes / no)  
 372 Annual frequency of foot care (no. of occasions)  
 373 Shearing (yes / no)  
 374 Shearing equipment used (shearing shears / shearing machine)  
 375 Recording of births – maintenance of a lambing book (yes / no)  
 376 Disinfection of navel stumps in newborns (yes / no)  
 377 Tail docking in newborns (yes / no)  
 378 Routine administration of antimicrobials in newborns (yes / no)  
 379 Antimicrobials administered (description)  
 380 Maintenance of quarantine period for new animals into the farm (yes / no)  
 381 Isolation of sick animals (yes / no)

---

#### 4.7. Vectors

---

- 382 Presence of spots suitable for reproduction of vectors (yes / no)  
 383 Types of spots identified (muddy spots inside or outside the buildings, near the water troughs / spots of wet manure / ditches with manure)  
 384 Distance of spots from farm (>50 m / 50-500 m / >500 m)

---

#### 5. NUTRITION

---

- 385 Grazing (yes / no)  
 386 Duration of grazing during the winter (no. of months)



|     |                                                                                                                                                                                                                                                                      |
|-----|----------------------------------------------------------------------------------------------------------------------------------------------------------------------------------------------------------------------------------------------------------------------|
| 387 | Distance from farm of area grazed during the winter (km)                                                                                                                                                                                                             |
| 388 | Duration of grazing during the summer (no. of months)                                                                                                                                                                                                                |
| 389 | Distance from farm of area grazed during the summer (km)                                                                                                                                                                                                             |
| 390 | Type of graze area (meadow / wetland / scrub pasture / hay / forest / other)                                                                                                                                                                                         |
| 391 | Common grazing for sheep and goats (yes / no)                                                                                                                                                                                                                        |
| 392 | Provision of hay as fodder to animals (yes / no)                                                                                                                                                                                                                     |
| 393 | Total quantity of hay consumed during the preceding season (tonnes)                                                                                                                                                                                                  |
| 394 | Plants included in hay consumed by animals (description)                                                                                                                                                                                                             |
| 395 | Hay type (dried plant / pelleted)                                                                                                                                                                                                                                    |
| 396 | Origin of hay (own production / purchase)                                                                                                                                                                                                                            |
| 397 | Provision of straw to animals (yes / no)                                                                                                                                                                                                                             |
| 398 | Provision of silage to adult animals (yes / no)                                                                                                                                                                                                                      |
| 399 | Provision of silage to young animals (yes / no)                                                                                                                                                                                                                      |
| 400 | Total quantity of silage consumed during the preceding season (tonnes)                                                                                                                                                                                               |
| 401 | Origin of silage (own production / purchase)                                                                                                                                                                                                                         |
| 402 | Provision of finished feed to animals (yes / no)                                                                                                                                                                                                                     |
| 403 | Origin of silage (own production / purchase)                                                                                                                                                                                                                         |
| 404 | Provision of finished feed (concentrate) to animals throughout the year (yes / no)                                                                                                                                                                                   |
| 405 | Finished feed (concentrate) form provided to adult animals (mashed / pellets / flakes / other)                                                                                                                                                                       |
| 406 | Provision of finished feed (concentrate) to young animals (yes / no)                                                                                                                                                                                                 |
| 407 | Finished feed (concentrate) type provided to young animals (mashed / pellets / flakes / other)                                                                                                                                                                       |
| 408 | Total quantity of finished feed (concentrate) consumed during the preceding season (tonnes)                                                                                                                                                                          |
| 409 | Total quantity of raw materials purchased during the preceding season (tonnes)                                                                                                                                                                                       |
| 410 | Raw materials used by the farm in the diets (corn / wheat / barley / bran / soyabean meal / cottonmeal / sunflower meal / fats / salt / phosphate salts / magnesium salts / limestone / trace minerals / water soluble vitamins / fat soluble vitamins)              |
| 411 | Raw materials purchased by the farm for use in the diets (corn / wheat / barley / bran / soyabean meal / cottonmeal / sunflower meal / fats / salt / phosphate salts / magnesium salts / limestone / trace minerals / water soluble vitamins / fat soluble vitamins) |
| 412 | Premix purchase for use in the diets (yes / no)                                                                                                                                                                                                                      |
| 413 | Nutrient content in finished feed (description)                                                                                                                                                                                                                      |
| 414 | Feed change in animals (abrupt / progressive)                                                                                                                                                                                                                        |
| 415 | Water source (local water board / drilling / other source)                                                                                                                                                                                                           |
| 416 | Water provision to animals (water troughs / tank / water collectors / fountains / rivers / lakes / other)                                                                                                                                                            |
| 417 | Use of laboratory examinations for quality testing of feeds and raw material (yes / no)                                                                                                                                                                              |
| 418 | Laboratory examinations used (description)                                                                                                                                                                                                                           |
| 419 | Use of laboratory examinations for quality testing of water (yes / no)                                                                                                                                                                                               |
| 420 | Laboratory examinations used (description)                                                                                                                                                                                                                           |
| 421 | Person responsible for nutritional management (farmer / nutritionist / animal scientist / veterinarian / other)                                                                                                                                                      |

---

## 6. HUMAN RESOURCES

---

### 6.1. Farmer

---

|     |                                                      |
|-----|------------------------------------------------------|
| 422 | Age (years)                                          |
| 423 | Previous animal farming experience (yes / no)        |
| 424 | Length of previous animal farming experience (years) |
| 425 | General education (yes / no)                         |
| 426 | General education (description)                      |
| 427 | Professional education (yes / no)                    |
| 428 | Professional education (description)                 |
| 429 | Primary language spoken (description)                |
| 430 | Farmer by profession (yes / no)                      |
| 431 | Daily period of presence in the farm (hours)         |
| 432 | Marital status (description)                         |

### 6.2. Public health

---

|     |                                                                                                                                  |
|-----|----------------------------------------------------------------------------------------------------------------------------------|
| 433 | Personal opinion regarding occurrence of transmission of diseases from animals to the farmer or members of the family (yes / no) |
| 434 | Diseases, according to above, for which transmission occurred from animals (description)                                         |

---

---

**6.3. Family**

---

- 435 Work of family members in the farm (yes / no)  
436 Family tradition in farming (yes / no)  
437 Total members of the family (no.)
- 

**6.4. Staff**

---

- 438 Ethnicity (Greek local / Greek from other part of the country / non-Greek)  
439 Nationality of non-Greek nationals (description)  
440 Age (years)  
441 Previous farming experience (yes / no)  
442 Length of previous animal farming experience (years)
- 

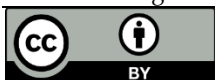

© 2020 by the authors. Published under the terms and conditions of the Creative Commons Attribution (CC BY) license (<http://creativecommons.org/licenses/by/4.0/>).
